# Supplementary material for: Abnormal neurometabolites in fibromyalgia patients: Magnetic resonance spectroscopy study
Source: PubMed Central journal article supplement — Mol Pain. 2021 Feb 11;17:1744806921990946. doi: 10.1177/1744806921990946 (PMC7887674; doi:10.1177/1744806921990946), 2021-02-11
Supplement: sj-pdf-1-mpx-10.1177_1744806921990946.pdf [file sj-pdf-1-mpx-10.1177_1744806921990946.pdf]

**Supplementary Table 1. Participant`s demographic characteristics.**

|                            | FM patients | Healthy controls | <i>p</i> -value  |
|----------------------------|-------------|------------------|------------------|
| N                          | 12          | 13               |                  |
| Age                        | 41.7±14.0   | 40.1±6.3         | <i>p</i> = 0.723 |
| Gender                     | 5M, 7F      | 9M, 4F           | <i>p</i> = 0.165 |
| Education(years)           | 14.4±2.6    | 16.2±2.1         | <i>p</i> = 0.068 |
| Duration of illness(years) | 4.4 ± 3.1   | N/A              |                  |

Data are mean ± standard deviation. **FM**: Fibromyalgia; **M** = male, **F** = female
